# Supplementary material for: Role of a conserved aspartic acid in nucleotide binding domain 1 (NBD1) of Hsp100 chaperones in their activities
Source: PubMed Central journal article supplement — Cell Stress Chaperones. 2011 Dec 6;17(3):361–73. doi: 10.1007/s12192-011-0312-4 (PMC3312961; doi:10.1007/s12192-011-0312-4), 2011-12-06
Supplement: 12192_2011_312_MOESM1_ESM.pdf [file 12192_2011_312_MOESM1_ESM.pdf]

## Supplemental data

**Table S1**

| GuHCl                                              | DnaK<br>(DnaJ, GrpE) |      | Ssa1p<br>(Ydj1p) |     | ClpB |      | Hsp104 |     |
|----------------------------------------------------|----------------------|------|------------------|-----|------|------|--------|-----|
|                                                    | -                    | +    | -                | +   | -    | +    | -      | +   |
| ATPase activity<br>[turn-over; min <sup>-1</sup> ] | 14,8                 | 13,9 | 5,9              | 4,8 | 3,4  | 17,2 | 19,6   | 8,3 |

TABLE S1. **The influence of GuHCl on the ATPase activities of bacterial and yeast Hsp70 and Hsp100 chaperones.** The ATPase activities of particular chaperones were measured in the absence or presence of GuHCl (5 mM) in a coupled enzymatic assay. Chaperone concentrations: 1  $\mu$ M DnaK (in the presence of 0.2  $\mu$ M DnaJ and 0.1  $\mu$ M GrpE); 3  $\mu$ M Ssa1p (in the presence of 1  $\mu$ M Yj1p); 4  $\mu$ M ClpB; 1  $\mu$ M Hsp104.

**Figure S1**

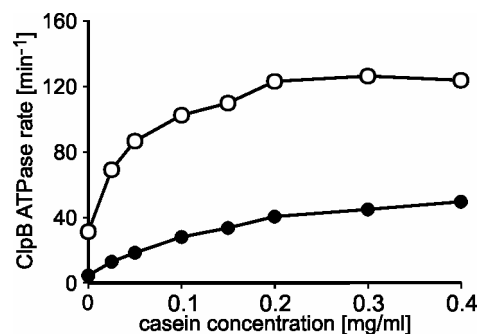

FIGURE S1. **GuHCl stimulation of the ATPase activity of ClpB is casein-independent.** In the presence of increasing concentrations of casein the ATPase activity of ClpB (1  $\mu$ M) was measured in the absence (filled circles) or presence of 5 mM GuHCl (open circles).

Figure S2

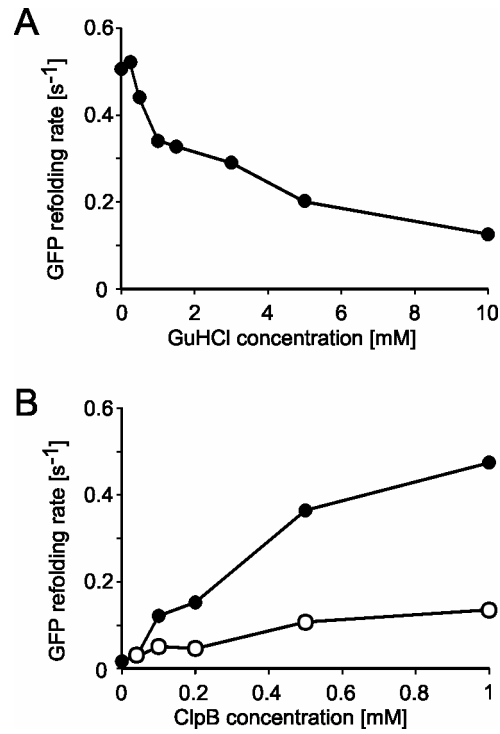

FIGURE S2. **GuHCl inhibits the disaggregation of heat aggregated GFP by the bacterial KJE-ClpB chaperone system *in vitro*.** *A*, heat-aggregated GFP (9  $\mu$ g) was incubated with the KJE-ClpB chaperone system (0.5  $\mu$ M ClpB, 1  $\mu$ M DnaK, 0.2  $\mu$ M DnaJ, 0.1  $\mu$ M GrpE). GFP reactivation was monitored in real-time in a spectrofluorometer (excitation and emission wavelengths: 395 nm and 510 nm, respectively). GFP reactivation was measured in the presence of increasing concentrations of GuHCl. The rate of reaction (increase in GFP fluorescence/s) was calculated from the slope of the linear part of each curve and plotted as a function of GuHCl concentration. *B*, GFP refolding rate was measured as in *A*. In the absence (filled circles) or presence of 5 mM GuHCl (open circles) over a range of ClpB concentrations.

**Figure S3**

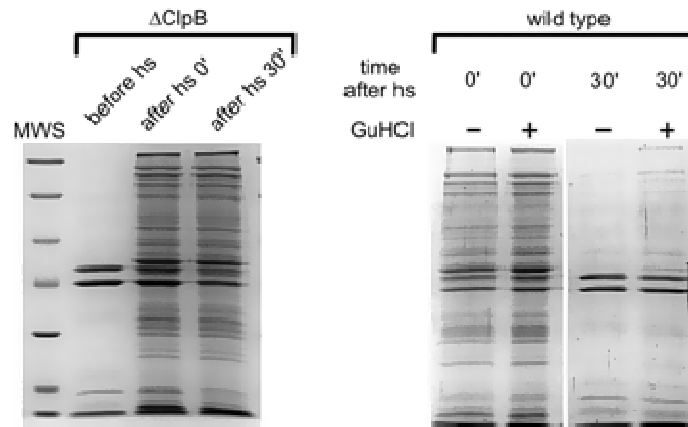

**FIGURE S3. GuHCl inhibits the removal of protein aggregates following heat stress.** *E. coli* MC1000 (parent) and  $\Delta clpB$  strains were grown at 37°C to  $OD_{600} = 0.3$ ; GuHCl was then added to the final concentration of 20 mM and cultures were shifted to 50°C for 8 min. After heat-shock bacteria were returned to 37°C to allow protein disaggregation. At the indicated timepoints samples were taken (corresponding to 12 ml of culture of  $OD_{600} = 1$ ), rapidly cooled in an ice-water bath and cells were harvested by centrifugation for 10 min at 5000×g at 4°C. Pellets were resuspended in 2.5 ml of buffer K (10 mM potassium phosphate buffer, pH 6.8; 1 mM EDTA) and cell lysis was performed in an SLM Aminco French pressure cell. Cell lysates were centrifuged for 15 min at 2000×g, 4°C to eliminate intact cells. The insoluble cell fraction (containing membranes and protein aggregates) was isolated by subsequent centrifugation at 15000×g, 4°C for 20 min. Pellet fractions were resuspended in 400  $\mu$ l of buffer K and centrifuged once more (20 min, 15 000×g, 4°C). After centrifugation the pellets were resuspended in 320  $\mu$ l of buffer K, followed by addition of 80  $\mu$ l of 10% (v/v) NP-40; protein aggregates were isolated by centrifugation (30 min, 15000×g, 4°C). The washing procedure was repeated to completely dissolve membranes. The detergent-insoluble fraction was washed with 400  $\mu$ l of buffer K and centrifuged (30 min, 15000×g, 4°C). Pellets were resuspended in 65  $\mu$ l of buffer K and then analyzed by SDS-PAGE (12.5%) followed by Coomassie Blue staining.

**Figure S4**

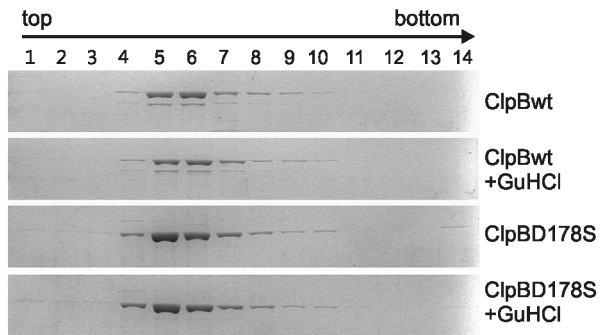

**FIGURE S4. Mutation D178S in ClpB does not influence the oligomeric state of the protein.** Sedimentation analysis of ClpBwt, ClpBD178S oligomerization. ClpBwt (*upper panels*) and ClpBD178S (*lower panels*) diluted in buffer U were loaded onto a glycerol gradient in buffer C supplemented with 5 mM ATP and (where indicated) with 5mM GuHCl. Sedimentation analysis of the proteins was performed (Beckman SW60 rotor; 15-45% (v/v) glycerol gradient; 46 000 rpm; 16 h; 4°C). The position of ClpBw and ClpBD178S in the gradients was visualized by SDS-PAGE and Coomassie Blue staining.

Figure S5

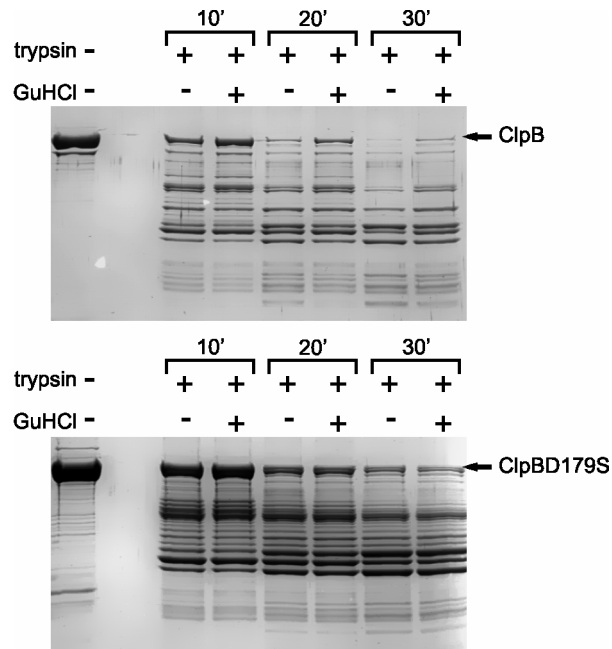

**FIGURE S5. Mutation D179S in ClpB influences both the trypsin digestion pattern and the rate of digestion.** Kinetics of the partial trypsin digestion of 4  $\mu\text{g}$  of ClpB (*upper panel*) and ClpB (D179S) (*lower panel*) in the presence of 2 mM ATP and the presence or absence of 5 mM GuHCl (as indicated). Reactions (10  $\mu\text{l}$ ) were assembled and incubated at 30°C with 0.07  $\mu\text{g}$  of trypsin. At the indicated time points reactions were stopped by the addition of Laemmli buffer. Proteolysis products were analyzed by SDS-PAGE and Coomassie Blue staining.

**Figure S6**

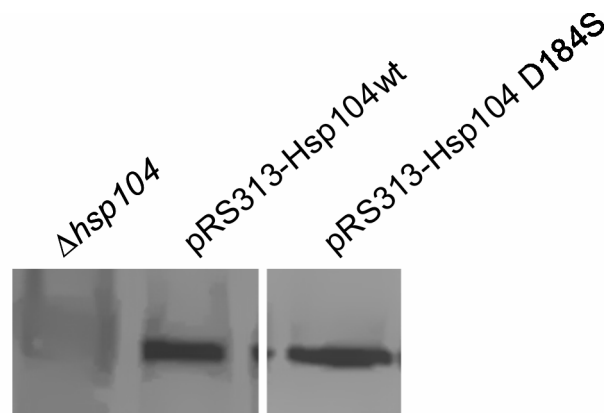

**FIGURE S6. Hsp104 and Hsp104 (D184S) are present in yeast cells in similar amounts.** Equal amounts of yeast strain  $\Delta hsp104$  carrying the plasmids pRS313-Hsp104 wt or pRS313-Hsp104(D184S) were collected and lysed. The samples were resolved by SDS-PAGE, followed by western blot analysis using anti-Hsp104 antibodies.
